# Supplementary material for: A Multi-Parametric Approach for Characterising Cerebral Haemodynamics in Acute Ischaemic and Haemorrhagic Stroke
Source: MDPI journal article supplement (doi:10.3390/healthcare12100966), 2024-05-08
Supplement: s1 [file s1]

**Table S3:** Significant cerebral haemodynamic and baroreceptor sensitivity parameters

| Parameters:                   | AIS<br>n = 68     | ICH<br>n = 12     | P- value | 95% CI                   | Difference<br>between means $\pm$<br>SEM |
|-------------------------------|-------------------|-------------------|----------|--------------------------|------------------------------------------|
| SYSTOLIC VEL,<br>(AH), cm/s   | 64.39 $\pm$ 17.36 | 82.87 $\pm$ 27.90 | 0.01     | (7.516; 33.74)           | 20.63 $\pm$ 6.570                        |
| DIASTOLIC VEL,<br>(AH), cm/s  | 26.03 $\pm$ 8.66  | 32.51 $\pm$ 9.86  | 0.05     | (- 0.1009;<br>14.50)     | 7.198 $\pm$ 3.659                        |
| Mean Coherence<br>(VLF), (AH) | 0.43 $\pm$ 0.18   | 0.28 $\pm$ 0.16   | 0.01     | (- 0.2934; -<br>0.03816) | -0.1658 $\pm$ 0.06398                    |
| Mean Coherence<br>(LF), (AH)  | 0.50 $\pm$ 0.21   | 0.34 $\pm$ 0.17   | 0.01     | (- 0.3246; -<br>0.04244) | -0.1835 $\pm$ 0.07073                    |
| Mean Coherence<br>(HF), (AH)  | 0.56 $\pm$ 0.21   | 0.39 $\pm$ 0.18   | 0.016    | (- 0.3113; -<br>0.03247) | -0.1719 $\pm$ 0.06988                    |
| ARI (UH)                      | 4.81 $\pm$ 2.02   | 5.96 $\pm$ 1.77   | 0.07     | (- 0.09844;<br>2.197)    | 1.050 $\pm$ 0.5764                       |
| Mean Coherence<br>(LF), (UH)  | 0.51 $\pm$ 0.23   | 0.28 $\pm$ 0.18   | 0.002    | (- 0.3706; -<br>0.08491) | -0.2278 $\pm$ 0.07173                    |
| Mean Coherence<br>(HF), (UH)  | 0.55 $\pm$ 0.22   | 0.37 $\pm$ 0.23   | 0.02     | (- 0.3363; -<br>0.02705) | -0.1817 $\pm$ 0.07762                    |
| Mean gain MF<br>range (BRS)   | 5.89 $\pm$ 5.32   | 2.71 $\pm$ 1.89   | 0.046    | (- 6.323; -<br>0.05268)  | -3.188 $\pm$ 1.575                       |
| BRS for LF band               | 6.7 $\pm$ 4.2     | 4.10 $\pm$ 2.13   | 0.040    | (- 5.091; -<br>0.1118)   | -2.601 $\pm$ 1.250                       |
