# Supplementary material for: A Multi-Parametric Approach for Characterising Cerebral Haemodynamics in Acute Ischaemic and Haemorrhagic Stroke
Source: MDPI journal article supplement (doi:10.3390/healthcare12100966), 2024-05-08
Supplement: s1 [file s1]

**Table S2:** Cerebral autoregulation and baroreceptor sensitivity parameters

| Parameters:                                | AIS<br>n = 68 | ICH<br>n = 12 | P- value    |
|--------------------------------------------|---------------|---------------|-------------|
| CBv (AH), cm/s                             | 39.74 ± 15.46 | 49.54 ± 19.28 | <b>0.05</b> |
| CBv (UH), cm/s                             | 43.91 ± 13.67 | 46.49 ± 13.22 | 0.54        |
| SYSTOLIC VEL, (UH),<br>cm/s                | 69.64 ± 18.84 | 77.38 ± 16.77 | 0.18        |
| DIASTOLIC VEL, (UH),<br>cm/s               | 27.32 ± 9.97  | 30.42 ± 7.68  | 0.31        |
| Mean coherence (AH)                        | 0.59 ± 0.25   | 0.47 ± 0.20   | 0.12        |
| ARI (AH)                                   | 5.11 ± 1.87   | 5.77 ± 2.08   | 0.28        |
| NMSE, (AH)                                 | 0.18 ± 0.14   | 0.20 ± 0.11   | 0.64        |
| Step response recovery<br>(%) at 4 s, (AH) | 64.44 ± 31.13 | 82.57 ± 35.55 | 0.07        |
| Mean LOWER conf.<br>limit coherence, (AH)  | 0.47 ± 0.30   | 0.31 ± 0.21   | 0.10        |
| Mean UPPER conf. limit<br>coherence, (AH)  | 0.70 ± 0.21   | 0.63 ± 0.21   | 0.30        |
| LF gain (AH), % / mmHg                     | 0.33 ± 0.18   | 0.37 ± 0.18   | 0.52        |
| MF gain (AH), % /<br>mmHg                  | 0.54 ± 0.35   | 0.53 ± 0.24   | 0.93        |
| HF gain (AH), % /<br>mmHg                  | 0.65 ± 0.33   | 0.78 ± 0.45   | 0.22        |
| LF phase (AH), radians                     | 0.59 ± 0.64   | 0.86 ± 0.83   | 0.20        |

|                                         |                   |                   |              |
|-----------------------------------------|-------------------|-------------------|--------------|
| MF phase (AH), radians                  | $0.57 \pm 0.40$   | $0.46 \pm 0.41$   | 0.38         |
| HF phase (AH), radians                  | $0.06 \pm 0.27$   | $0.16 \pm 0.34$   | 0.26         |
| Mean coherence (UH)                     | $0.57 \pm 0.27$   | $0.41 \pm 0.28$   | 0.07         |
| NMSE (UH)                               | $0.17 \pm 0.12$   | $0.28 \pm 0.16$   | 0.24         |
| Mean Coherence (VLF), (UH)              | $0.43 \pm 0.21$   | $0.32 \pm 0.20$   | 0.10         |
| Mean Coherence (LF), (UH)               | $0.50 \pm 0.23$   | $0.28 \pm 0.18$   | 0.002        |
| Mean Coherence (HF), (UH)               | $0.55 \pm 0.25$   | $0.37 \pm 0.23$   | 0.02         |
| Step response recovery (%) at 4 s, (UH) | $68.16 \pm 24.34$ | $79.09 \pm 22.45$ | 0.15         |
| Mean LOWER conf. limit coherence, (UH)  | $0.45 \pm 0.31$   | $0.29 \pm 0.28$   | 0.08         |
| Mean UPPER conf. limit coherence, (UH)  | $0.69 \pm 0.23$   | $0.55 \pm 0.28$   | 0.06         |
| LF gain (UH), % / mmHg                  | $0.51 \pm 0.44$   | $0.36 \pm 0.28$   | 0.25         |
| MF gain (UH), % / mmHg                  | $0.64 \pm 0.47$   | $0.43 \pm 0.26$   | 0.14         |
| HF gain (UH), % / mmHg                  | $0.75 \pm 0.43$   | $0.71 \pm 0.44$   | 0.73         |
| LF phase (UH), radians                  | $0.62 \pm 0.52$   | $1.12 \pm 0.60$   | <b>0.004</b> |
| MF phase (UH), radians                  | $0.60 \pm 0.34$   | $0.54 \pm 0.27$   | 0.53         |
| HF phase (UH), radians                  | $0.05 \pm 0.26$   | $0.20 \pm 0.32$   | 0.09         |

|                                      |                  |                 |      |
|--------------------------------------|------------------|-----------------|------|
| Mean gain HF range (BRS)             | 9.04 ± 9.37      | 5.94 ± 7.75     | 0.28 |
| total power (PI), ms <sup>2</sup>    | 2011.7 ± 3918.01 | 1201.8 ± 2462.1 | 0.44 |
| total power (SBP), mmHg <sup>2</sup> | 33.08 ± 27.43    | 32.04 ± 26.93   | 0.77 |
| VLF power (PI), ms <sup>2</sup>      | 313.58 ± 406.4   | 138.71 ± 115.2  | 0.13 |
| VLF power (SBP), mmHg <sup>2</sup>   | 15.65 ± 15.29    | 14.18 ± 14.01   | 0.75 |
| BRS for VLF band                     | 4.56 ± 2.77      | 2.98 ± 2.22     | 0.06 |
| LF power (PI), ms <sup>2</sup>       | 523.68 ± 1155.43 | 283.67 ± 546.03 | 0.44 |
| LF power (SBP), mmHg <sup>2</sup>    | 7.67 ± 6.84      | 5.31 ± 3.36     | 0.18 |
| HF power (PI), ms <sup>2</sup>       | 1475.91 ± 3216.4 | 1539.5 ± 3751.1 | 0.52 |
| HF power (SBP), mmHg <sup>2</sup>    | 4.96 ± 10.79     | 7.9 ± 12.6      | 0.30 |
| BRS for HF band                      | 10.61 ± 7.56     | 9.06 ± 10.03    | 0.53 |
| alpha index                          | 8.82 ± 5.72      | 6.58 ± 5.95     | 0.22 |

AH, affected hemispheres; UH, unaffected hemispheres; VLF, very low frequency LF, low frequency; MF, medium frequency; HF, High frequency; CBv, Cerebral Blood Velocity; VEL, Velocity; ARI, Autoregulation index; NMSE, normalized mean-square error; BRS, baroreceptor sensitivity; PI, Pulse Interval; SBP; systolic blood pressure, alpha index (Average BRS LF + BRS HF).

P-values for difference between ischemic and haemorrhagic stroke.
