# Supplementary material for: A Multi-Parametric Approach for Characterising Cerebral Haemodynamics in Acute Ischaemic and Haemorrhagic Stroke
Source: MDPI journal article supplement (doi:10.3390/healthcare12100966), 2024-05-08
Supplement: s1 [file s1]

**Table S1:** Spectral power density of ABP and CBv

| Parameters                                 | AIS<br>n = 68 | ICH<br>n = 12 | P-value |
|--------------------------------------------|---------------|---------------|---------|
| CBv power LF range (AH), cm/s <sup>2</sup> | 0.18 ± 0.34   | 0.25 ± 0.22   | 0.50    |
| CBv power MF range (AH), cm/s <sup>2</sup> | 0.02 ± 0.04   | 0.05 ± 0.08   | 0.20    |
| CBv power HF range (AH), cm/s <sup>2</sup> | 0.01 ± 0.03   | 0.02 ± 0.04   | 0.34    |
| ABP power LF range (AH), mmHg <sup>2</sup> | 0.54 ± 0.54   | 0.38 ± 0.39   | 0.34    |
| ABP power MF range (AH), mmHg <sup>2</sup> | 0.09 ± 0.23   | 0.10 ± 0.21   | 0.92    |
| ABP power HF range (AH), mmHg <sup>2</sup> | 0.02 ± 0.03   | 0.02 ± 0.03   | 0.93    |
| CBv power LF range (UH), cm/s <sup>2</sup> | 0.28 ± 0.33   | 0.25 ± 0.22   | 0.77    |
| CBv power MF range (UH), cm/s <sup>2</sup> | 0.03 ± 0.04   | 0.05 ± 0.06   | 0.29    |
| CBv power HF range (UH), cm/s <sup>2</sup> | 0.01 ± 0.02   | 0.019 ± 0.015 | 0.68    |
| ABP power LF range (UH), mmHg <sup>2</sup> | 0.54 ± 0.53   | 0.43 ± 0.38   | 0.48    |
| ABP power MF range (UH), mmHg <sup>2</sup> | 0.07 ± 0.10   | 0.06 ± 0.09   | 0.80    |
| ABP power HF range (UH), mmHg <sup>2</sup> | 0.02 ± 0.02   | 0.01 ± 0.01   | 0.79    |

CBv, cerebral blood flow velocity; ABP, arterial blood pressure; AH, affected hemispheres; UH, unaffected hemispheres. LF, low frequency; MF, medium frequency; HF, High frequency.

P-values for difference between ischemic and haemorrhagic stroke.
